# Supplementary material for: Long-Term Fate and Efficacy of a Biomimetic (Sr)-Apatite-Coated Carbon Patch Used for Bone Reconstruction
Source: MDPI journal article supplement (doi:10.3390/jfb14050246), 2023-04-26
Supplement: s1 [file s1]

## Supplementary Information

### Long term fate and efficacy of biomimetic apatite-coated carbon patch used for bone reconstruction

Florian Olivier, Christophe Drouet, Olivier Marsan, Vincent Sarou-Kanian, Samah Rekima, Nadine Gautier, Franck Fayon, Sylvie Bonnamy and Nathalie Rochet

**Figure S1.** Illustration of the segmentation method used to detect carbon material from histological slides. Microscopic images before (left side) and after segmentation (right side) of carbon (red) versus tissue (green).

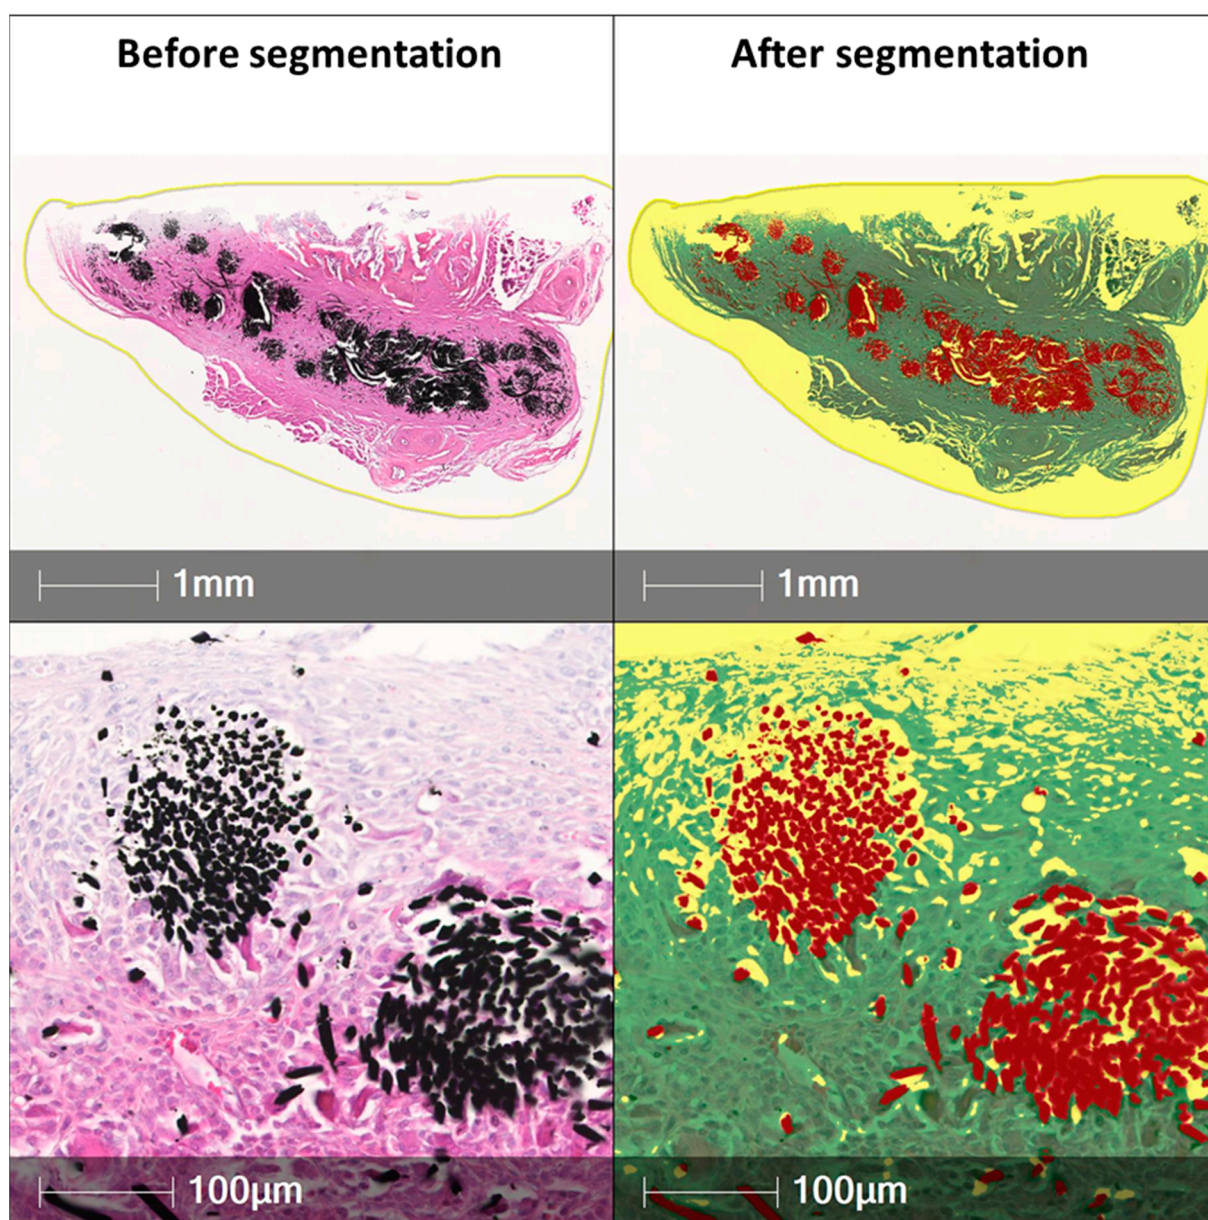

**Figure S2.** Raman spectra of the newly-formed bone from several punctual analyses for the three groups tested *in vivo* (control, ACC/CDA and ACC/10Sr-CDA). The similarity in position and width of the  $\nu_1(\text{PO}_4)$  band is in particular highlighted.

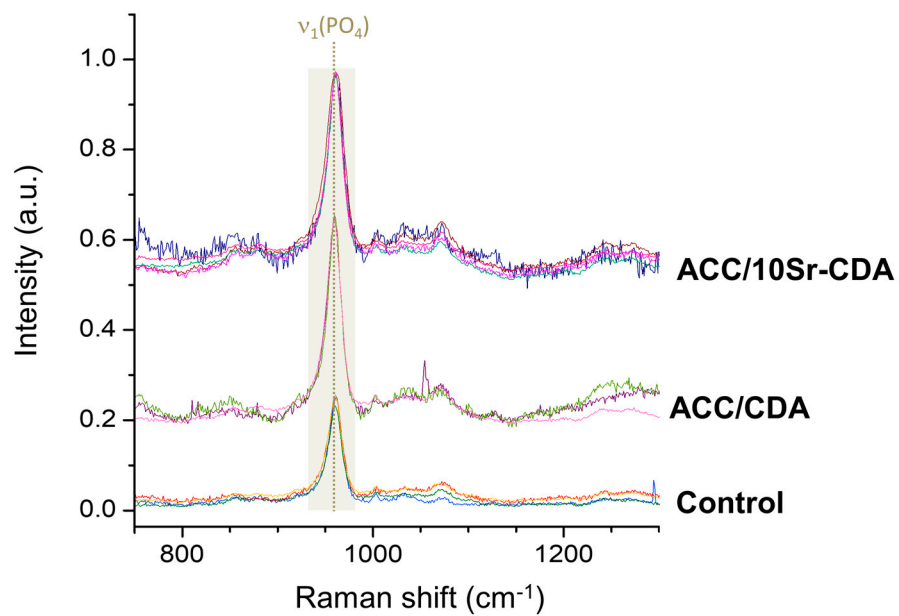

**Table S1.** Raman band characteristics after curve-fitting for different depths Z of analysis.

| Sample positioning along Z axis | Remarkable peak assignments | Peak position | Peak height | Gaussian/Lorentzian mixing parameter (0 = L; 1 = G) | Peak width | Peak area |
|---------------------------------|-----------------------------|---------------|-------------|-----------------------------------------------------|------------|-----------|
| Z = 0 $\mu\text{m}$             |                             | 824.2         | 192.9       | 1                                                   | 18.3       | 3748.0    |
|                                 | proline                     | 850.2         | 663.7       | 0.25                                                | 19.9       | 18007.8   |
|                                 |                             | 859.9         | 222.1       | 0.97                                                | 9.4        | 2262.4    |
|                                 | hydroxyproline              | 875.1         | 494.6       | 1                                                   | 22.4       | 11804.6   |
|                                 |                             | 893.7         | 273.6       | 0.32                                                | 15.2       | 5718.9    |
|                                 |                             | 923.9         | 742.2       | 0.25                                                | 39.5       | 40231.4   |
|                                 | v1(PO4) am                  | 955.3         | 2043.3      | 0.61                                                | 28.0       | 71030.3   |
|                                 | v1(PO4) ap                  | 961.7         | 6230.4      | 0.44                                                | 13.2       | 109187.0  |
|                                 |                             | 1003.6        | 665.7       | 0                                                   | 8.3        | 8560.7    |
|                                 |                             | 1035.0        | 1067.2      | 0.14                                                | 46.4       | 71267.7   |
|                                 | v1(CO3)                     | 1071.6        | 538.4       | 0.51                                                | 21.1       | 14721.0   |
|                                 |                             | 1085.1        | 478.7       | 1                                                   | 50.0       | 25476.2   |
|                                 |                             | 1184.4        | 137.9       | 1                                                   | 26.9       | 3948.7    |
|                                 |                             | 1206.7        | 257.9       | 0.4                                                 | 13.2       | 4603.5    |
|                                 | amide III                   | 1241.4        | 359.3       | 1                                                   | 23.8       | 9108.9    |
|                                 | amide III                   | 1270.1        | 798.0       | 0.11                                                | 48.3       | 56048.8   |
|                                 | amide III                   | 1305.1        | 432.6       | 1                                                   | 20.3       | 9327.4    |
|                                 |                             | 1385.9        | 315.3       | 1                                                   | 14.7       | 4933.4    |
|                                 |                             | 1402.7        | 212.3       | 0.5                                                 | 22.1       | 6082.4    |
|                                 | CH2                         | 1441.6        | 719.6       | 0.36                                                | 38.2       | 36509.5   |
|                                 | CH2                         | 1453.4        | 799.7       | 1                                                   | 32.9       | 28030.5   |
| Z = 200 $\mu\text{m}$           | proline                     | 854.7         | 479.5       | 0.45                                                | 27.0       | 16876.0   |
|                                 | hydroxyproline              | 878.8         | 179.4       | 1                                                   | 15.2       | 2896.5    |
|                                 | v1(PO4) am                  | 946.1         | 1103.3      | 0.03                                                | 17.9       | 30214.2   |
|                                 | v1(PO4) ap                  | 960.5         | 6160.1      | 0.87                                                | 15.9       | 110582.4  |
|                                 |                             | 1039.7        | 430.2       | 1                                                   | 45.7       | 20943.4   |
|                                 | v1(CO3)                     | 1072.1        | 792.0       | 0.79                                                | 20.9       | 19223.4   |
|                                 |                             | 1096.7        | 337.6       | 1                                                   | 37.2       | 13381.1   |
|                                 | amide III                   | 1241.8        | 334.7       | 0.57                                                | 22.4       | 9544.1    |
|                                 | amide III                   | 1271.2        | 376.5       | 0                                                   | 30.8       | 17709.7   |
|                                 |                             | 1340.8        | 3591.2      | 0.07                                                | 0.0        | 153.8     |
|                                 |                             | 1389.5        | 202.9       | 0.42                                                | 29.2       | 7873.3    |
|                                 |                             | 1422.9        | 342.3       | 0                                                   | 24.8       | 12880.2   |
|                                 | CH2                         | 1448.4        | 581.8       | 0.77                                                | 22.7       | 15354.4   |
|                                 | CH2                         | 1464.4        | 318.8       | 1                                                   | 21.4       | 7263.3    |
| Z = 400 $\mu\text{m}$           |                             | 814.8         | 329.8       | 0.43                                                | 17.9       | 7707.64   |
|                                 |                             | 833.6         | 282.4       | 1                                                   | 14.0       | 4221.76   |
|                                 | proline                     | 853.0         | 735.7       | 1                                                   | 18.2       | 14235.39  |
|                                 | hydroxyproline              | 875.2         | 499.8       | 1                                                   | 21.8       | 11609.33  |
|                                 | v1(PO4) am                  | 953.9         | 3724.9      | 0.41                                                | 21.7       | 108387.29 |
|                                 | v1(PO4) ap                  | 963.3         | 4157.4      | 1                                                   | 14.6       | 64414.71  |
|                                 |                             | 1004.5        | 241.3       | 0.48                                                | 7.4        | 2364.74   |
|                                 |                             | 1032.4        | 630.6       | 0.08                                                | 17.0       | 16206.71  |
|                                 |                             | 1049.2        | 401.5       | 1                                                   | 17.4       | 7429.4    |
|                                 | v1(CO3)                     | 1072.0        | 1393.9      | 0.45                                                | 22.4       | 41465.02  |
|                                 |                             | 1097.1        | 465.8       | 0.55                                                | 37.1       | 21983.41  |
|                                 |                             | 1125.5        | 70.3        | 1                                                   | 9.4        | 703.27    |
|                                 | amide III                   | 1243.6        | 527.3       | 0.47                                                | 23.9       | 16577.44  |
|                                 | amide III                   | 1272.6        | 391.0       | 0.6                                                 | 24.3       | 11924.97  |
|                                 |                             | 1385.1        | 256.3       | 0.82                                                | 19.0       | 5570.12   |
|                                 |                             | 1401.6        | 201.2       | 1                                                   | 11.0       | 2347.33   |
|                                 |                             | 1423.4        | 575.5       | 0                                                   | 37.8       | 32388.66  |
|                                 | CH2                         | 1451.7        | 621.1       | 1                                                   | 26.4       | 17465.01  |
|                                 | CH2                         | 1463.2        | 430.0       | 1                                                   | 27.5       | 12586.23  |

**Table S1.** (continued)

| Sample positioning along Z axis | Remarkable peak assignments | Peak position | Peak height | Gaussian/Lorentzian mixing parameter (0 = L; 1 = G) | Peak width | Peak area |
|---------------------------------|-----------------------------|---------------|-------------|-----------------------------------------------------|------------|-----------|
| Z = 600 $\mu\text{m}$           |                             | 814.4         | 100.3       | 1                                                   | 9.2        | 981.04    |
|                                 |                             | 827.1         | 61.2        | 0.81                                                | 13.0       | 916.45    |
|                                 | proline                     | 854.3         | 538.7       | 0                                                   | 30.9       | 24756.13  |
|                                 | hydroxyproline              | 878.7         | 258.1       | 1                                                   | 14.0       | 3842.8    |
|                                 | v1(PO4) am                  | 947.3         | 1210.0      | 0.81                                                | 20.8       | 29041.57  |
|                                 | v1(PO4) ap                  | 961.0         | 6036.8      | 0.91                                                | 16.1       | 107412.78 |
|                                 |                             | 1037.1        | 435.0       | 0.03                                                | 33.7       | 22123.26  |
|                                 | v1(CO3)                     | 1072.2        | 1072.8      | 0                                                   | 27.1       | 44575.56  |
|                                 |                             | 1102.6        | 182.1       | 1                                                   | 35.7       | 6912      |
|                                 | amide III                   | 1242.9        | 355.3       | 0.82                                                | 24.9       | 10171.55  |
|                                 | amide III                   | 1272.3        | 264.5       | 0.53                                                | 25.7       | 8725.19   |
|                                 |                             | 1375.2        | 411.5       | 1                                                   | 19.2       | 8415.8    |
|                                 |                             | 1402.5        | 841.4       | 0.72                                                | 23.0       | 23117.12  |
|                                 |                             | 1422.1        | 273.4       | 0.32                                                | 17.0       | 6429.51   |
|                                 | CH2                         | 1450.7        | 625.1       | 0.79                                                | 30.2       | 21827.96  |
|                                 | CH2                         | 1467.3        | 242.5       | 0.35                                                | 26.4       | 8577.78   |
| Z = 800 $\mu\text{m}$           |                             | 831.9         | 347.6       | 0.49                                                | 50.0       | 21525.27  |
|                                 | proline                     | 855.8         | 515.9       | 0.88                                                | 19.8       | 11413.19  |
|                                 | hydroxyproline              | 879.3         | 560.3       | 0.97                                                | 17.6       | 10628.11  |
|                                 | v1(PO4) am                  | 946.4         | 1163.2      | 0.61                                                | 18.7       | 27214.18  |
|                                 | v1(PO4) ap                  | 960.5         | 6092.0      | 0.81                                                | 15.9       | 111854.21 |
|                                 |                             | 1003.7        | 260.1       | 1                                                   | 8.5        | 2346.54   |
|                                 |                             | 1040.9        | 516.6       | 1                                                   | 37.5       | 20608.02  |
|                                 |                             | 1058.1        | 139.2       | 1                                                   | 15.6       | 2317.35   |
|                                 | v1(CO3)                     | 1071.0        | 671.4       | 1                                                   | 15.6       | 11178.23  |
|                                 |                             | 1083.5        | 586.6       | 0                                                   | 28.8       | 25871.29  |
|                                 |                             | 1104.5        | 191.3       | 0                                                   | 31.3       | 9175.64   |
|                                 | amide III                   | 1242.9        | 315.4       | 0.71                                                | 21.6       | 8195.04   |
|                                 | amide III                   | 1271.6        | 323.9       | 0                                                   | 25.4       | 12638.65  |
|                                 |                             | 1342.9        | 137.5       | 1                                                   | 8.2        | 1195.84   |
|                                 |                             | 1387.5        | 267.2       | 1                                                   | 25.1       | 7138.97   |
|                                 |                             | 1404.0        | 183.8       | 1                                                   | 9.7        | 1898.43   |
|                                 |                             | 1421.5        | 413.9       | 0                                                   | 25.7       | 16107.66  |
| Native cortical bone            | CH2                         | 1450.2        | 574.3       | 0.37                                                | 31.0       | 23736.17  |
|                                 | CH2                         | 1458.2        | 382.4       | 1                                                   | 31.1       | 12675.06  |
|                                 |                             | 814.0         | 170.4       | 0                                                   | 16.2       | 4135.83   |
|                                 | proline                     | 853.3         | 404.5       | 0                                                   | 22.1       | 13508.32  |
|                                 | hydroxyproline              | 877.1         | 178.0       | 1                                                   | 18.3       | 3468.73   |
|                                 | v1(PO4) am                  | 951.1         | 1772.1      | 0.77                                                | 25.9       | 53638.68  |
|                                 | v1(PO4) ap                  | 960.5         | 5214.0      | 0.88                                                | 15.5       | 90744.63  |
|                                 |                             | 1002.9        | 254.1       | 1                                                   | 6.3        | 1695.85   |
|                                 |                             | 1033.1        | 286.6       | 0.35                                                | 18.1       | 7152.23   |
|                                 | v1(CO3)                     | 1072.4        | 910.5       | 0                                                   | 28.8       | 40252.93  |
|                                 |                             | 1103.4        | 138.8       | 0                                                   | 14.2       | 3050.87   |
|                                 |                             | 1202.4        | 91.3        | 1                                                   | 6.3        | 616.14    |
|                                 | amide III                   | 1242.2        | 334.6       | 1                                                   | 21.5       | 7667.61   |
|                                 | amide III                   | 1270.5        | 329.1       | 0.02                                                | 31.8       | 15898.97  |
|                                 |                             | 1420.9        | 302.8       | 0                                                   | 50.0       | 22138.19  |
|                                 | CH2                         | 1455.0        | 534.6       | 1                                                   | 29.6       | 16825.86  |
|                                 | CH2                         | 1470.7        | 8521.2      | 0.03                                                | 0.1        | 74.85     |
